# Supplementary material for: N-myc is a key switch regulating the proliferation cycle of postnatal cerebellar granule cell progenitors
Source: PubMed Central journal article supplement (PMC4523855; doi:10.1038/srep12740), 2015-08-04

# **N-myc is a key switch regulating the proliferation cycle of postnatal cerebellar granule cell progenitors**

Ming Ma<sup>1</sup>, Wenting Wu<sup>2</sup>, Qing Li<sup>1</sup>, Zhejin Sheng<sup>1</sup>, Jiahao Shi<sup>1</sup>, Mengjie Zhang<sup>1</sup>,

Hua Yang<sup>1</sup>, Zhugang Wang<sup>2</sup>, Ruilin Sun<sup>2\*</sup> and Jian Fei<sup>1\*</sup>

<sup>1</sup>School of Life Science and Technology, Tongji University. Shanghai 200092, China

<sup>2</sup>Shanghai Research Center for Model Organisms, Shanghai 201203, China

## **Supplementary information**

**Supplementary table S1.** The primers of Real time PCR.

|         |                                  |
|---------|----------------------------------|
| Ccnd1-f | -5'-TGACTGCCGAGAAGTTGTGC -3'-    |
| Ccnd1-r | -5'-CTCATCCGCCTCTGGCATT -3'-     |
| Ccnd2-f | -5'-GAGTGGGAACTGGTAGTGTTG -3'-   |
| Ccnd2-r | -5'-CGCACAGAGCGATGAAGGT -3'-     |
| Ccnd3-f | -5'-CGAGCCTCCTACTTCCAGTG -3'-    |
| Ccnd3-r | -5'-GGACAGGTAGCGATCCAGGT -3'-    |
| Ccne1-f | -5'-GGTGTCCCTCGCTGCTTCTGCTT -3'- |
| Ccne1-r | -5'-CCGGATAACCATGGCGAACGGA -3'-  |
| CDK6-f  | -5'-GGCGTACCCACAGAAACCATA-3'-    |
| CDK6-r  | -5'-AGGTAAGGGCCATCTGAAAAC-3'-    |

|                  |                              |
|------------------|------------------------------|
| $\beta$ -actin-f | -5'-CCTGTATGCCTCTGGTCGTA-3'- |
| $\beta$ -actin-r | -5'-CCATCTCCTGCTCGAAGTCT-3'- |

**Supplementary Figure S1.** The whole image of Western blotting assay for Ccnd2 expression in the GCPs of tTS mice and TRE mice.

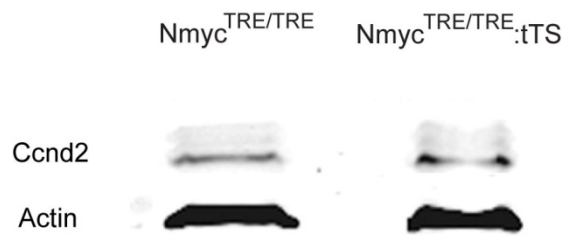

Supplement: srep12740-s1.pdf [file srep12740-s1.pdf]
